# Supplementary material for: Comparison of Iris Claw Phakic Lenses Implant Versus Corneal Laser Techniques in High Myopia. Five Years Follow-up
Source: Research Square preprint supplement (doi:10.21203/rs.3.rs-1711305/v1), 2022-06-22
Supplement: Supplementary file 1 [file 1437c96044e8c2f9d4859116.xlsx]

## Sheet: Hoja1
		Table 5: Coefficients of the linear regression model
		Coefic Error Stand t valor P-valor
		Constant 0.96 0.05 20.476 < 2e-16 ***
		Sph Equival preop 0.04 0.01 10.716 < 2e-16 ***
		Tecnique[Phakic Lens] 0.43 0.04 10.316 < 2e-16 ***
		Tecnique[PRK] -0.08 0.02 -3.069 0.00226 **
		Dependent Variable: UCVA 5 years postop. R2: 0.3071. R2 adjusted: 0.3032. p-value: < 2.2e-16
