# Supplementary material for: Comparison of Iris Claw Phakic Lenses Implant Versus Corneal Laser Techniques in High Myopia. Five Years Follow-up
Source: Research Square preprint supplement (doi:10.21203/rs.3.rs-1711305/v1), 2022-06-22
Supplement: Supplementary file 2 [file 48bc23376d354cc49cf7f7f7.xlsx]

## Sheet: Hoja1
		Table 3: Descriptive statistics Safety index according to techniques
			Mean	Std Dev	Std error	95% confidence interval
						Lower Limit	Upper Limit
	Safety1m	PRK	0.9	0.32	0.02	0.86	0.94
		FS-Lasik	1.09	0.34	0.02	1.05	1.13
		Artiflex	1.24	0.55	0.08	1.08	1.41
		Artisan	1.58	0.19	0.11	1.11	2.05
		Total	1.03	0.37	0.02	1	1.06
	Safety3m	PRK	1.03	0.35	0.02	0.98	1.07
		FS-Lasik	1.16	0.38	0.02	1.11	1.2
		Artiflex	1.25	0.58	0.09	1.07	1.44
		Artisan	1.46	0.24	0.11	1.16	1.76
		Total	1.11	0.39	0.02	1.08	1.14
	Safety1y	PRK	1.07	0.36	0.02	1.02	1.11
		FS-Lasik	1.22	0.67	0.04	1.14	1.3
		Artiflex	1.14	0.2	0.04	1.06	1.23
		Artisan	1.19	0.36	0.12	0.91	1.47
		Total	1.15	0.53	0.02	1.1	1.19
	Safety2y	PRK	1.1	0.4	0.03	1.05	1.15
		FS-Lasik	1.2	0.44	0.03	1.14	1.25
		Artiflex	1.14	0.2	0.05	1.03	1.24
		Artisan	1.37	0.14	0.06	1.2	1.54
		Total	1.15	0.42	0.02	1.12	1.19
	Safety5y	PRK	1.14	0.39	0.02	1.1	1.19
		FS-Lasik	1.24	0.5	0.03	1.18	1.3
		Artiflex	1.1	0.3	0.09	0.9	1.3
		Artisan	1.24	0.22	0.13	0.68	1.79
		Total	1.19	0.45	0.02	1.16	1.23
