# Supplementary material for: Comparison of Iris Claw Phakic Lenses Implant Versus Corneal Laser Techniques in High Myopia. Five Years Follow-up
Source: Research Square preprint supplement (doi:10.21203/rs.3.rs-1711305/v1), 2022-06-22
Supplement: Supplementary file 3 [file 707067ecd405e4bceda6fbb2.xlsx]

## Sheet: Hoja1
		Table 1. Descriptive statistics effectiveness index according to techniques
				N	Mean	Std Dev	95% confidence interval
							Lower Limit	Upper Limit
	Efectiveness1m		PRK	245	0.69	0.35	0.65	0.73
			FS-Lasik	284	0.84	0.38	0.79	0.88
			Artiflex	70	1.03	0.59	0.89	1.18
			Artisan	5	0.88	0.49	0.28	1.48
	Efectiveness3m		PRK	243	0.83	0.36	0.78	0.88
			FS-Lasik	273	0.95	0.38	0.91	1
			Artiflex	71	1.07	0.48	0.94	1.19
			Artisan	6	0.97	0.45	0.5	1.44
	Efectiveness1y		PRK	236	0.86	0.33	0.82	0.91
			FS-Lasik	253	1	0.69	0.91	1.08
			Artiflex	53	1.15	0.44	1.02	1.27
			Artisan	8	1.3	0.35	1.01	1.59
	Efectiveness2y		PRK	229	0.91	0.35	0.87	0.96
			FS-Lasik	249	0.93	0.41	0.88	0.98
			Artiflex	24	1.16	0.37	1	1.31
			Artisan	4	0.91	0.56	0.01	1.81
	Efectiveness5y		PRK	241	0.82	0.42	0.77	0.87
			FS-Lasik	252	0.86	0.46	0.81	0.92
			Artiflex	35	1.1	0.24	1.01	1.18
			Artisan	2	1.4	0.1	0.46	2.33
