# Supplementary material for: Comparison of Iris Claw Phakic Lenses Implant Versus Corneal Laser Techniques in High Myopia. Five Years Follow-up
Source: Research Square preprint supplement (doi:10.21203/rs.3.rs-1711305/v1), 2022-06-22
Supplement: Supplementary file 4 [file 8460ce4e95be3bc30132c882.xlsx]

## Sheet: Hoja1
		Table 4: Mean differences between surgeries techniques safety in the follow-up periods
						Mean Differences	Std Error	P-value
		Variable Depend
				PRK	FS-Lasik	-0,18	0.03	< 0.01
					Artiflex	-0.34	0.09	< 0.01
					Artisan	-0.68	0.11	0.2
		Safety1m		FS-Lasik	Artiflex	-0.16	0.09	0.53
					Artisan	-0.49	0.11	0.35
				Artiflex	Artisan	-0.34	0.14	0.46
				PRK	FS-Lasik	-0,13	0.03	< 0.01
					Artiflex	-0.23	0.1	0.2
					Artisan	-0.44	0.11	0.14
		Safety3m		FS-Lasik	Artiflex	-0.1	0.1	0.98
					Artisan	-0.3	0.11	0.39
				Artiflex	Artisan	-0.21	0.14	0.85
				PARK	FS-Lasik	-0,15	0.05	0.02
					Artiflex	-0.08	0.05	0.67
					Artisan	-0.12	0.12	0.99
		Safety1y		FS-Lasik	Artiflex	0.08	0.06	0.88
					Artisan	0.03	0.13	1
				Artiflex	Artisan	-0.04	0.13	1
				PARK	FS-Lasik	-0.09	0.04	0.15
					Artiflex	0.04	0.09	1
					Artisan	-0.09	0.13	1
		Safety5y		FS-Lasik	Artiflex	0.14	0.1	0.85
					Artisan	0	0.13	1
				Artiflex	Artisan	-0.14	0.16	1
