# Supplementary material for: Comparison of Iris Claw Phakic Lenses Implant Versus Corneal Laser Techniques in High Myopia. Five Years Follow-up
Source: Research Square preprint supplement (doi:10.21203/rs.3.rs-1711305/v1), 2022-06-22
Supplement: Supplementary file 5 [file b6afe1c269b0ea06dea8db59.xlsx]

## Sheet: Hoja1
	Table 2. Comparison between surgeries techniques' effectiveness in the follow-up periods
				Mean differences	Std Error	p-Value
	Variable dep
		PRK	FS-Lasik	-0,15*	0.03	< 0.01
			Artiflex	-0,34*	0.08	< 0.01
	Efectiveness1m		Artisan	-0.19	0.22	1
		FS-Lasik	Artiflex	-0.19	0.08	0.12
			Artisan	-0.04	0.22	1
		Artiflex	Artisan	0.15	0.23	1
		PRK	FS-Lasik	-0,12*	0.03	< 0.01
			Artiflex	-0,24*	0.06	< 0.01
	Efectiveness3m		Artisan	-0.14	0.18	1
		FS-Lasik	Artiflex	-0.11	0.06	0.56
			Artisan	-0.02	0.18	1
		Artiflex	Artisan	0.09	0.19	1
		PRK	FS-Lasik	-0.13	0.05	0.06
			Artiflex	-0,28*	0.07	< 0.01
			Artisan	-0.43	0.13	0.09
	Efectiveness1y	Fs-Lasik	Artiflex	-0.15	0.08	0.41
			Artisan	-0.3	0.13	0.39
		Artiflex	Artisan	-0.15	0.14	0.97
		PRK	FS-Lasik	-0.04	0.04	0.96
			Artiflex	-0,28*	0.05	< 0.01
	Efectiveness5y		Artisan	-0.58	0.08	0.41
		FS-Lasik	Artiflex	-0,23*	0.05	< 0.01
			Artisan	-0.53	0.08	0.43
		Artiflex	Artisan	-0.3	0.09	0.58
		* p<0.05
